# Supplementary material for: A Novel Strategy for the Design of Aurein 1.2 Analogs with Enhanced Bioactivities by Conjunction of Cell-Penetrating Regions
Source: MDPI journal article supplement (doi:10.3390/antibiotics12020412), 2023-02-19
Supplement: s1 [file s1]

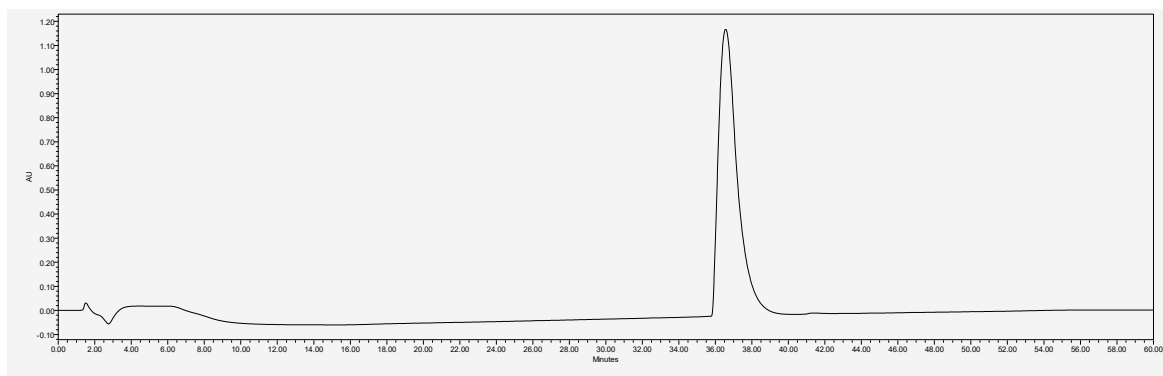

(A)

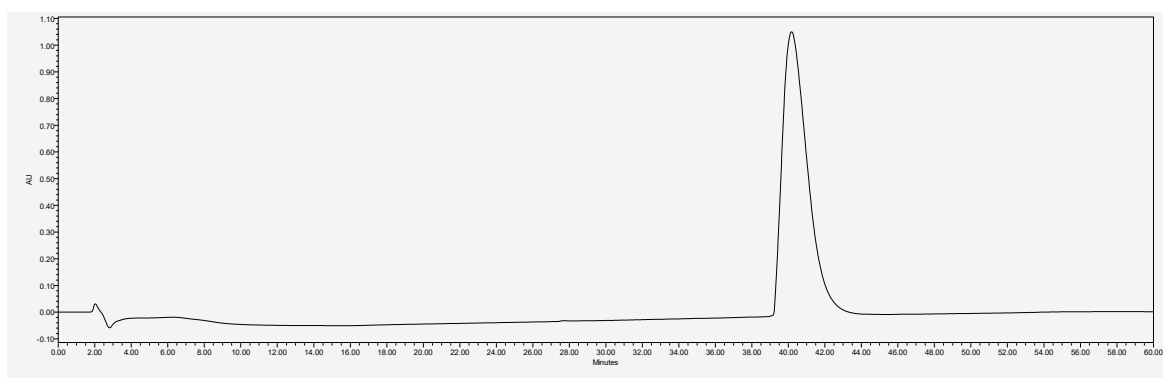

(B)

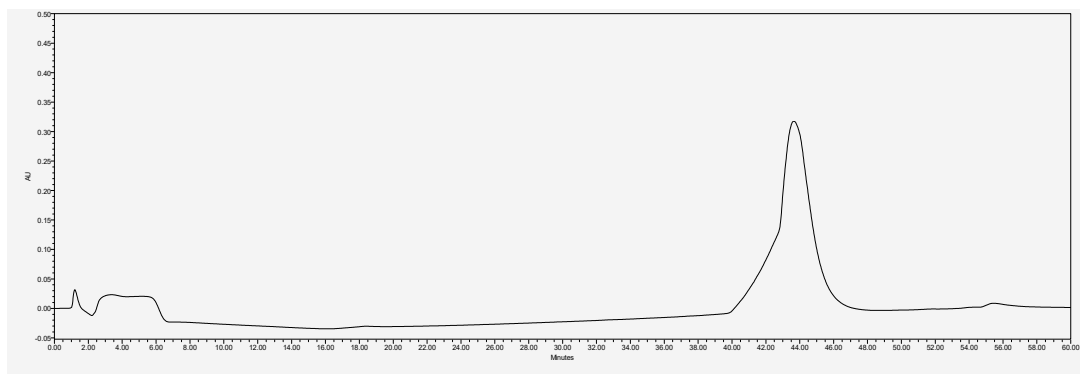

(C)

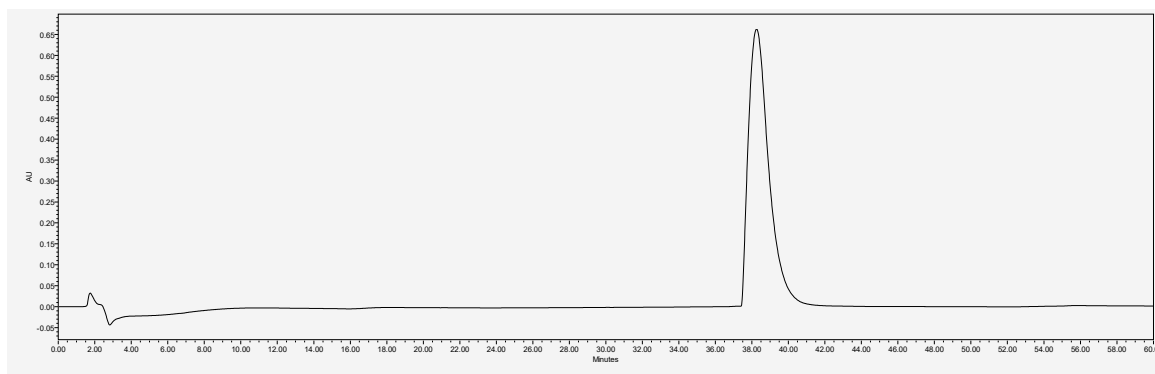

(D)

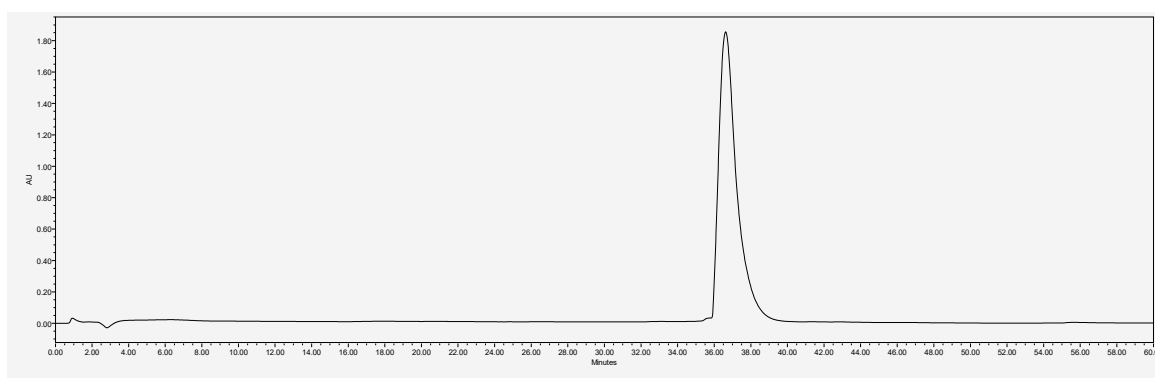

(E)

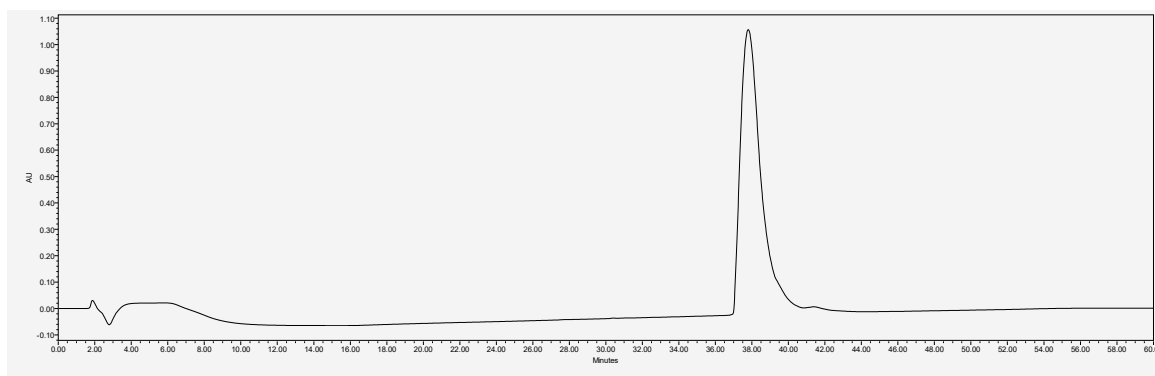

(F)

**Figure S1.** The RP-HPLC chromatograms of purified (A) aurein 1.2, (B) IK-1, (C) IK-2, (D) IK-3, (E) KLA-1 and (F) KLA-2 monitored at 214 nm.
